# Supplementary material
Source: PubMed Central journal article supplement (PMC10197923)
Supplement: NIHMS1896314-supplement-Supplementary_Material.pdf [file NIHMS1896314-supplement-Supplementary_Material.pdf]

---

**Supplementary information**

---

# **Optimization of lipid nanoparticles for the delivery of nebulized therapeutic mRNA to the lungs**

---

In the format provided by the  
authors and unedited

---

**Supplementary information**

---

# **Optimization of lipid nanoparticles for the delivery of nebulized therapeutic mRNA to the lungs**

---

In the format provided by the  
authors and unedited

## Table of Contents

|                              |    |
|------------------------------|----|
| Supplementary Figure 1 ..... | 2  |
| Supplementary Figure 2 ..... | 4  |
| Supplementary Figure 3 ..... | 5  |
| Supplementary Figure 4 ..... | 6  |
| Supplementary Figure 5 ..... | 7  |
| Supplementary Figure 6 ..... | 8  |
| Supplementary Figure 7 ..... | 12 |
| Supplementary Figure 8 ..... | 13 |

a

## Group A

| Components |             |          |        | Molar Ratio |             |     |        | Lipid:RNA Ratio | N:P Ratio | Included in Study | Diameters | PDI        |
|------------|-------------|----------|--------|-------------|-------------|-----|--------|-----------------|-----------|-------------------|-----------|------------|
| Lipomer    | Cholesterol | PEG      | Helper | Lipomer     | Cholesterol | PEG | Helper |                 |           |                   |           |            |
| 7C1        | Cholesterol | C14PEG2K | DOPE   | 60          | 10          | 2   | 28     | 10              | 6.8       | No                | 243.1     | Multimodal |
| 7C1        | Cholesterol | C14PEG2K | DOPE   | 55          | 10          | 2   | 33     | 10              | 6.6       | No                | 271.4     | 0.552      |
| 7C1        | Cholesterol | C14PEG2K | DOPE   | 45          | 10          | 2   | 43     | 10              | 6.1       | No                | 242.6     | Multimodal |
| 7C1        | Cholesterol | C14PEG2K | DOPE   | 35          | 10          | 2   | 53     | 10              | 5.6       | No                | 204.89    | 0.237      |
| 7C1        | Cholesterol | C14PEG2K | DOPE   | 30          | 10          | 2   | 58     | 10              | 5.2       | No                | 211.62    | 0.418      |
| 7C1        | Cholesterol | C14PEG2K | DOPE   | 60          | 10          | 2   | 28     | 10              | 6.8       | No                | 290.4     | 0.314      |
| 7C1        | Cholesterol | C14PEG2K | DOPE   | 55          | 10          | 2   | 33     | 10              | 6.6       | No                | 327.7     | Multimodal |
| 7C1        | Cholesterol | C14PEG2K | DOPE   | 45          | 10          | 2   | 43     | 10              | 6.1       | No                | 288.98    | Multimodal |
| 7C1        | Cholesterol | C14PEG2K | DOPE   | 35          | 10          | 2   | 53     | 10              | 5.6       | No                | 281.32    | 0.469      |
| 7C1        | Cholesterol | C14PEG2K | DOPE   | 30          | 10          | 2   | 58     | 10              | 5.2       | No                | 615.22    | Multimodal |

## Group B

| Components |             |          |        | Molar Ratio |             |     |        | Lipid:RNA Ratio | N:P Ratio | Included in Study | Diameters | PDI        |
|------------|-------------|----------|--------|-------------|-------------|-----|--------|-----------------|-----------|-------------------|-----------|------------|
| Lipomer    | Cholesterol | PEG      | Helper | Lipomer     | Cholesterol | PEG | Helper |                 |           |                   |           |            |
| 7C1        | Cholesterol | C14PEG2K | DOPE   | 80          | 20          | 0   | 0      | 10              | 7.5       | No                | 885.68    | Multimodal |
| 7C1        | Cholesterol | C14PEG2K | DOPE   | 75          | 25          | 0   | 0      | 10              | 7.5       | No                | 244.8     | Multimodal |
| 7C1        | Cholesterol | C14PEG2K | DOPE   | 70          | 30          | 0   | 0      | 10              | 7.4       | No                | 265.8     | 0.469      |
| 7C1        | Cholesterol | C14PEG2K | DOPE   | 65          | 35          | 0   | 0      | 10              | 7.3       | No                | 52        | Multimodal |
| 7C1        | Cholesterol | C14PEG2K | DOPE   | 60          | 40          | 0   | 0      | 10              | 7.2       | No                | 59.1      | Multimodal |
| 7C1        | Cholesterol | C14PEG2K | DOPE   | 55          | 45          | 0   | 0      | 10              | 7.1       | No                | 128.1     | Multimodal |
| 7C1        | Cholesterol | C14PEG2K | DOPE   | 50          | 50          | 0   | 0      | 10              | 7.0       | No                | 288.98    | Multimodal |
| 7C1        | Cholesterol | C14PEG2K | DOPE   | 45          | 55          | 0   | 0      | 10              | 6.8       | No                | 281.32    | 0.469      |

## Group C

| Components |             |          |        | Molar Ratio |             |     |        | Lipid:RNA Ratio | N:P Ratio | Included in Study | Diameters | PDI        |
|------------|-------------|----------|--------|-------------|-------------|-----|--------|-----------------|-----------|-------------------|-----------|------------|
| Lipomer    | Cholesterol | PEG      | Helper | Lipomer     | Cholesterol | PEG | Helper |                 |           |                   |           |            |
| 7C1        | Cholesterol | C14PEG2K | DOPE   | 80          | 0           | 0   | 20     | 10              | 7.3       | No                | 615.22    | Multimodal |
| 7C1        | Cholesterol | C14PEG2K | DOPE   | 75          | 0           | 0   | 25     | 10              | 7.2       | No                | 552.4     | Multimodal |
| 7C1        | Cholesterol | C14PEG2K | DOPE   | 70          | 0           | 0   | 30     | 10              | 7.1       | No                | 885.68    | Multimodal |
| 7C1        | Cholesterol | C14PEG2K | DOPE   | 65          | 0           | 0   | 35     | 10              | 6.9       | No                | 237.07    | Multimodal |
| 7C1        | Cholesterol | C14PEG2K | DOPE   | 60          | 0           | 0   | 40     | 10              | 6.8       | No                | 215.74    | Multimodal |
| 7C1        | Cholesterol | C14PEG2K | DOPE   | 55          | 0           | 0   | 45     | 10              | 6.6       | No                | 262.11    | 0.537      |
| 7C1        | Cholesterol | C14PEG2K | DOPE   | 50          | 0           | 0   | 50     | 10              | 6.4       | No                | 608.6     | Multimodal |
| 7C1        | Cholesterol | C14PEG2K | DOPE   | 45          | 0           | 0   | 55     | 10              | 6.2       | No                | 834.5     | Multimodal |

b

## Group D

| Components |             |          |        | Molar Ratio |             |     |        | Lipid:RNA Ratio | N:P Ratio | Included in Study | Diameters | PDI        |
|------------|-------------|----------|--------|-------------|-------------|-----|--------|-----------------|-----------|-------------------|-----------|------------|
| Lipomer    | Cholesterol | PEG      | Helper | Lipomer     | Cholesterol | PEG | Helper |                 |           |                   |           |            |
| 7C1        | Cholesterol | C14PEG2K | DOTAP  | 60          | 10          | 25  | 5      | 10              | 5.7       | No                | 123.3     | Multimodal |
| 7C1        | Cholesterol | C14PEG2K | DOTAP  | 50          | 23.5        | 6.5 | 20     | 10              | 6.3       | No                | 133.1     | Multimodal |
| 7C1        | Cholesterol | C14PEG2K | DOTAP  | 35          | 18          | 2.5 | 44.5   | 10              | 5.7       | Yes               | 161.2     | 0.408      |
| 7C1        | Cholesterol | C14PEG2K | DOTAP  | 20          | 37.5        | 15  | 27.5   | 10              | 3.8       | Yes               | 117.3     | 0.323      |
| 7C1        | Cholesterol | C14PEG2K | DOTMA  | 60          | 10          | 25  | 5      | 10              | 5.7       | Yes               | 149.4     | 0.453      |
| 7C1        | Cholesterol | C14PEG2K | DOTMA  | 50          | 23.5        | 6.5 | 20     | 10              | 6.3       | Yes               | 143.7     | 0.311      |
| 7C1        | Cholesterol | C14PEG2K | DOTMA  | 35          | 18          | 2.5 | 44.5   | 10              | 5.7       | No                | 107.3     | 0.526      |
| 7C1        | Cholesterol | C14PEG2K | DOTMA  | 20          | 37.5        | 15  | 27.5   | 10              | 3.8       | No                | 130.7     | Multimodal |
| 7C1        | Cholesterol | C14PEG2K | DDAB   | 60          | 10          | 25  | 5      | 10              | 5.7       | Yes               | 108.6     | 0.459      |
| 7C1        | Cholesterol | C14PEG2K | DDAB   | 50          | 23.5        | 6.5 | 20     | 10              | 6.3       | Yes               | 107.4     | 0.186      |
| 7C1        | Cholesterol | C14PEG2K | DDAB   | 35          | 18          | 2.5 | 44.5   | 10              | 5.8       | No                | 118.2     | Multimodal |
| 7C1        | Cholesterol | C14PEG2K | DDAB   | 20          | 37.5        | 15  | 27.5   | 10              | 3.9       | Yes               | 124.8     | 0.362      |

## Group E

| Components |             |          |        | Molar Ratio |             |     |        | Lipid:RNA Ratio | N:P Ratio | Included in Study | Diameters | PDI        |
|------------|-------------|----------|--------|-------------|-------------|-----|--------|-----------------|-----------|-------------------|-----------|------------|
| Lipomer    | Cholesterol | PEG      | Helper | Lipomer     | Cholesterol | PEG | Helper |                 |           |                   |           |            |
| 7C1        | Cholesterol | C14PEG2K | DOPE   | 60          | 5           | 30  | 5      | 10              | 5.5       | Yes               | 73.6      | 0.203      |
| 7C1        | Cholesterol | C14PEG2K | DOPE   | 55          | 5           | 35  | 5      | 10              | 5.1       | Yes               | 123       | 0.42       |
| 7C1        | Cholesterol | C14PEG2K | DOPE   | 45          | 5           | 45  | 5      | 10              | 4.3       | Yes               | 166       | 0.189      |
| 7C1        | Cholesterol | C14PEG2K | DOPE   | 35          | 5           | 55  | 5      | 10              | 3.5       | Yes               | 91.5      | 0.428      |
| 7C1        | Cholesterol | C14PEG2K | DOPE   | 30          | 5           | 60  | 5      | 10              | 3.0       | Yes               | 135.1     | 0.162      |
| 7C1        | Cholesterol | C18PEG2K | DOPE   | 60          | 5           | 30  | 5      | 10              | 5.4       | Yes               | 148.1     | 0.146      |
| 7C1        | Cholesterol | C18PEG2K | DOPE   | 55          | 5           | 35  | 5      | 10              | 5.1       | Yes               | 62.4      | 0.226      |
| 7C1        | Cholesterol | C18PEG2K | DOPE   | 45          | 5           | 45  | 5      | 10              | 4.3       | No                | 278.7     | 0.457      |
| 7C1        | Cholesterol | C18PEG2K | DOPE   | 35          | 5           | 55  | 5      | 10              | 3.4       | No                | 224.6     | Multimodal |
| 7C1        | Cholesterol | C18PEG2K | DOPE   | 30          | 5           | 60  | 5      | 10              | 3.0       | No                | 270.2     | Multimodal |

## Group F

| Components |             |          |        | Molar Ratio |             |     |        | Lipid:RNA Ratio | N:P Ratio | Included in Study | Diameters | PDI   |
|------------|-------------|----------|--------|-------------|-------------|-----|--------|-----------------|-----------|-------------------|-----------|-------|
| Lipomer    | Cholesterol | PEG      | Helper | Lipomer     | Cholesterol | PEG | Helper |                 |           |                   |           |       |
| 7C1        | Cholesterol | C14PEG2K | DOPE   | 80          | 0           | 20  | 0      | 10              | 6.5       | Yes               | 86.9      | 0.299 |
| 7C1        | Cholesterol | C14PEG2K | DOPE   | 75          | 0           | 25  | 0      | 10              | 6.2       | Yes               | 107.1     | 0.411 |
| 7C1        | Cholesterol | C14PEG2K | DOPE   | 70          | 0           | 30  | 0      | 10              | 5.8       | Yes               | 52        | 0.319 |
| 7C1        | Cholesterol | C14PEG2K | DOPE   | 65          | 0           | 35  | 0      | 10              | 5.5       | Yes               | 64.6      | 0.35  |
| 7C1        | Cholesterol | C14PEG2K | DOPE   | 60          | 0           | 40  | 0      | 10              | 5.1       | Yes               | 128.7     | 0.382 |
| 7C1        | Cholesterol | C14PEG2K | DOPE   | 55          | 0           | 45  | 0      | 10              | 4.8       | Yes               | 105.8     | 0.448 |
| 7C1        | Cholesterol | C14PEG2K | DOPE   | 50          | 0           | 50  | 0      | 10              | 4.4       | Yes               | 87.1      | 0.323 |
| 7C1        | Cholesterol | C14PEG2K | DOPE   | 45          | 0           | 55  | 0      | 10              | 4.0       | No                | 62.4      | 0.226 |

**Supplementary Figure 1. (a)** Detailed outline of nanoparticles included from groups that failed the quality control analysis (A, B, and C). **(b)** Detailed outline of nanoparticles included from groups that passed the quality control analysis (D, E, and F).

a

| Mole Ratio   | 1  | 2  | 3  | 4  | 5  | 6  | 7    | 8    | 9    |
|--------------|----|----|----|----|----|----|------|------|------|
| 7C1          | 60 | 60 | 55 | 45 | 35 | 30 | 35   | 50   | 20   |
| PEG          | 25 | 30 | 35 | 45 | 55 | 60 | 2.5  | 6.5  | 15   |
| Cholesterol  | 10 | 5  | 5  | 5  | 5  | 5  | 18   | 23.5 | 37.5 |
| Helper Lipid | 5  | 5  | 5  | 5  | 5  | 5  | 44.5 | 20   | 27.5 |

b

| Components |             |          |        | Molar Ratio |             |     |        | Lipid:RNA Ratio | N:P Ratio | Included in Study | Diameters | PDI        |
|------------|-------------|----------|--------|-------------|-------------|-----|--------|-----------------|-----------|-------------------|-----------|------------|
| Lipomer    | Cholesterol | PEG      | Helper | Lipomer     | Cholesterol | PEG | Helper |                 |           |                   |           |            |
| 7C1        | Cholesterol | C14PEG2K | DOTAP  | 60          | 5           | 30  | 5      | 10              | 5.5       | No                | 179.6     | 0.341      |
| 7C1        | Cholesterol | C14PEG2K | DOTAP  | 55          | 5           | 35  | 5      | 10              | 5.1       | Yes               | 68.5      | 0.292      |
| 7C1        | Cholesterol | C14PEG2K | DOTAP  | 45          | 5           | 45  | 5      | 10              | 4.3       | Yes               | 95.2      | 0.561      |
| 7C1        | Cholesterol | C14PEG2K | DOTAP  | 35          | 5           | 55  | 5      | 10              | 3.5       | Yes               | 65.5      | 0.305      |
| 7C1        | Cholesterol | C14PEG2K | DOTAP  | 30          | 5           | 60  | 5      | 10              | 3.0       | No                | 193.8     | Multimodal |
| 7C1        | Cholesterol | C14PEG2K | DOTAP  | 60          | 10          | 25  | 5      | 10              | 5.7       | Yes               | 68.8      | 0.162      |
| 7C1        | Cholesterol | C14PEG2K | DOTAP  | 50          | 23.5        | 6.5 | 20     | 10              | 6.3       | No                | 173.1     | 0.304      |
| 7C1        | Cholesterol | C14PEG2K | DOTAP  | 35          | 18          | 2.5 | 44.5   | 10              | 5.7       | Yes               | 145.5     | 0.269      |
| 7C1        | Cholesterol | C14PEG2K | DOTAP  | 20          | 37.5        | 15  | 27.5   | 10              | 3.8       | No                | 149.1     | 0.529      |
| 7C1        | Cholesterol | C14PEG2K | DOTMA  | 60          | 5           | 30  | 5      | 10              | 5.5       | No                | 106.9     | Multimodal |
| 7C1        | Cholesterol | C14PEG2K | DOTMA  | 55          | 5           | 35  | 5      | 10              | 5.1       | Yes               | 141.1     | 0.568      |
| 7C1        | Cholesterol | C14PEG2K | DOTMA  | 45          | 5           | 45  | 5      | 10              | 4.3       | Yes               | 103.4     | 0.389      |
| 7C1        | Cholesterol | C14PEG2K | DOTMA  | 35          | 5           | 55  | 5      | 10              | 3.5       | Yes               | 69.4      | 0.268      |
| 7C1        | Cholesterol | C14PEG2K | DOTMA  | 30          | 5           | 60  | 5      | 10              | 3.0       | No                | 96.2      | Multimodal |
| 7C1        | Cholesterol | C14PEG2K | DOTMA  | 60          | 10          | 25  | 5      | 10              | 5.7       | No                | 355.7     | Multimodal |
| 7C1        | Cholesterol | C14PEG2K | DOTMA  | 50          | 23.5        | 6.5 | 20     | 10              | 6.3       | Yes               | 163.2     | 0.353      |
| 7C1        | Cholesterol | C14PEG2K | DOTMA  | 35          | 18          | 2.5 | 44.5   | 10              | 5.7       | Yes               | 152.6     | 0.202      |
| 7C1        | Cholesterol | C14PEG2K | DOTMA  | 20          | 37.5        | 15  | 27.5   | 10              | 3.8       | Yes               | 81.9      | 0.377      |
| 7C1        | Cholesterol | C14PEG2K | DDAB   | 60          | 5           | 30  | 5      | 10              | 5.5       | No                | 60.2      | 0.412      |
| 7C1        | Cholesterol | C14PEG2K | DDAB   | 55          | 5           | 35  | 5      | 10              | 5.1       | Yes               | 89.8      | 0.455      |
| 7C1        | Cholesterol | C14PEG2K | DDAB   | 45          | 5           | 45  | 5      | 10              | 4.3       | Yes               | 79.5      | 0.376      |
| 7C1        | Cholesterol | C14PEG2K | DDAB   | 35          | 5           | 55  | 5      | 10              | 3.5       | Yes               | 72.2      | 0.45       |
| 7C1        | Cholesterol | C14PEG2K | DDAB   | 30          | 5           | 60  | 5      | 10              | 3.0       | No                | 81.5      | Multimodal |
| 7C1        | Cholesterol | C14PEG2K | DDAB   | 60          | 10          | 25  | 5      | 10              | 5.7       | Yes               | 65.4      | 0.345      |
| 7C1        | Cholesterol | C14PEG2K | DDAB   | 50          | 23.5        | 6.5 | 20     | 10              | 6.3       | No                | 206       | Multimodal |
| 7C1        | Cholesterol | C14PEG2K | DDAB   | 35          | 18          | 2.5 | 44.5   | 10              | 5.8       | Yes               | 130       | 0.209      |
| 7C1        | Cholesterol | C14PEG2K | DDAB   | 20          | 37.5        | 15  | 27.5   | 10              | 3.9       | No                | 125.5     | Multimodal |

c

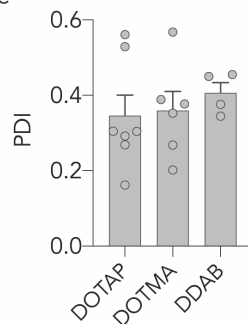

d

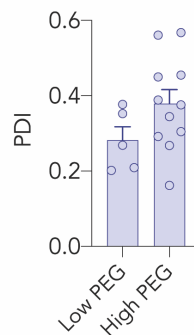

**Supplementary Figure 2. (a)** Molar ratios of individual LNPs nebulized. **(b)** The first iterations of individually tested LNPs were made of 7C1, cholesterol, C<sub>14</sub>PEG<sub>2000</sub>, and positive helper lipids at 9 different molar ratios.

a

| Components |             |          |        | Molar Ratio |             |     |        | Lipid:RNA Ratio | N:P Ratio | Included in Study | Diameters | PDI        |
|------------|-------------|----------|--------|-------------|-------------|-----|--------|-----------------|-----------|-------------------|-----------|------------|
| Lipomer    | Cholesterol | PEG      | Helper | Lipomer     | Cholesterol | PEG | Helper |                 |           |                   |           |            |
| 7C1        | Cholesterol | C14PEG2K | DOPE   | 60          | 5           | 30  | 5      | 10              | 5.5       | Yes               | 45.4      | 0.199      |
| 7C1        | Cholesterol | C14PEG2K | DOPE   | 55          | 5           | 35  | 5      | 10              | 5.1       | Yes               | 56.6      | 0.201      |
| 7C1        | Cholesterol | C14PEG2K | DOPE   | 45          | 5           | 45  | 5      | 10              | 4.3       | Yes               | 54.2      | 0.187      |
| 7C1        | Cholesterol | C14PEG2K | DOPE   | 35          | 5           | 55  | 5      | 10              | 3.5       | Yes               | 50.7      | 0.308      |
| 7C1        | Cholesterol | C14PEG2K | DOPE   | 30          | 5           | 60  | 5      | 10              | 3.0       | Yes               | 40.8      | 0.143      |
| 7C1        | Cholesterol | C18PEG2K | DOPE   | 60          | 5           | 30  | 5      | 10              | 5.4       | No                | 165.5     | Multimodal |
| 7C1        | Cholesterol | C18PEG2K | DOPE   | 55          | 5           | 35  | 5      | 10              | 5.1       | Yes               | 45.6      | 0.201      |
| 7C1        | Cholesterol | C18PEG2K | DOPE   | 45          | 5           | 45  | 5      | 10              | 4.3       | Yes               | 197.1     | 0.201      |
| 7C1        | Cholesterol | C18PEG2K | DOPE   | 35          | 5           | 55  | 5      | 10              | 3.4       | Yes               | 41.7      | 0.24       |
| 7C1        | Cholesterol | C18PEG2K | DOPE   | 30          | 5           | 60  | 5      | 10              | 3.0       | Yes               | 53.1      | 0.259      |
| 7C1        | Cholesterol | C14PEG2K | DOPE   | 60          | 10          | 25  | 5      | 10              | 5.7       | Yes               | 94.9      | 0.329      |
| 7C1        | Cholesterol | C14PEG2K | DOPE   | 50          | 23.5        | 6.5 | 20     | 10              | 6.3       | Yes               | 96.9      | 0.362      |
| 7C1        | Cholesterol | C14PEG2K | DOPE   | 35          | 18          | 2.5 | 44.5   | 10              | 5.6       | No                | 209.4     | 0.527      |
| 7C1        | Cholesterol | C14PEG2K | DOPE   | 20          | 37.5        | 15  | 27.5   | 10              | 3.8       | No                | 50.6      | 0.18       |
| 7C1        | Cholesterol | C18PEG2K | DOPE   | 60          | 10          | 25  | 5      | 10              | 5.7       | No                | 64.9      | 0.218      |
| 7C1        | Cholesterol | C18PEG2K | DOPE   | 50          | 23.5        | 6.5 | 20     | 10              | 6.2       | No                | 475.9     | 0.241      |
| 7C1        | Cholesterol | C18PEG2K | DOPE   | 35          | 18          | 2.5 | 44.5   | 10              | 5.6       | No                | 103.2     | Multimodal |
| 7C1        | Cholesterol | C18PEG2K | DOPE   | 20          | 37.5        | 15  | 27.5   | 10              | 3.7       | Yes               | 72.5      | 0.339      |
| 7C1        | Cholesterol | C14PEG2K | DSPC   | 60          | 10          | 25  | 5      | 10              | 5.7       | Yes               | 52.2      | 0.397      |
| 7C1        | Cholesterol | C14PEG2K | DSPC   | 50          | 23.5        | 6.5 | 20     | 10              | 6.2       | No                | 254.8     | 0.466      |
| 7C1        | Cholesterol | C14PEG2K | DSPC   | 35          | 18          | 2.5 | 44.5   | 10              | 5.6       | No                | 442.2     | Multimodal |
| 7C1        | Cholesterol | C14PEG2K | DSPC   | 20          | 37.5        | 15  | 27.5   | 10              | 3.7       | Yes               | 93.3      | 0.414      |
| 7C1        | Cholesterol | C18PEG2K | DSPC   | 60          | 10          | 25  | 5      | 10              | 5.7       | Yes               | 52.4      | 0.238      |
| 7C1        | Cholesterol | C18PEG2K | DSPC   | 50          | 23.5        | 6.5 | 20     | 10              | 6.2       | Yes               | 110.6     | 0.532      |
| 7C1        | Cholesterol | C18PEG2K | DSPC   | 35          | 18          | 2.5 | 44.5   | 10              | 5.5       | No                | 614.6     | Multimodal |
| 7C1        | Cholesterol | C18PEG2K | DSPC   | 20          | 37.5        | 15  | 27.5   | 10              | 3.7       | Yes               | 77.4      | 0.238      |

b

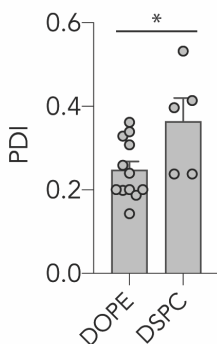

c

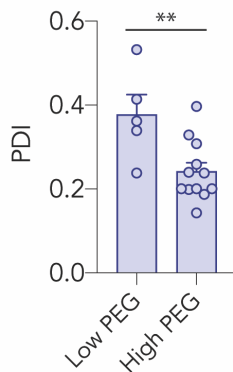

d

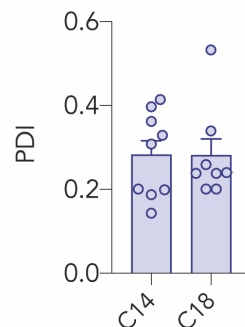

e

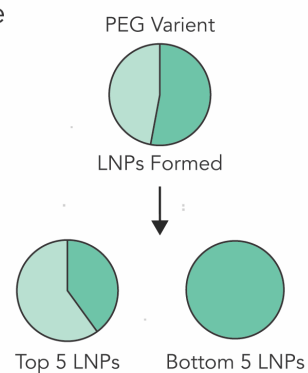

**Supplementary Figure 3. (a)** The second iterations of individually tested LNPs were comprised of 7C1, cholesterol, C<sub>14</sub>PEG<sub>2000</sub>, C<sub>18</sub>PEG<sub>2000</sub>, and neutral helper lipids at 9 different molar ratios. **(b-d)** LNP PDI as a function of helper lipid, PEG amount, and PEG type, respectively. **(b)** \**P* = 0.027, **(c)** \*\**P* = 0.0077, two-tailed, *t*-test. **(e)** PEG tail length found in the best and worst performing LNPs ranked by lung luminescence.

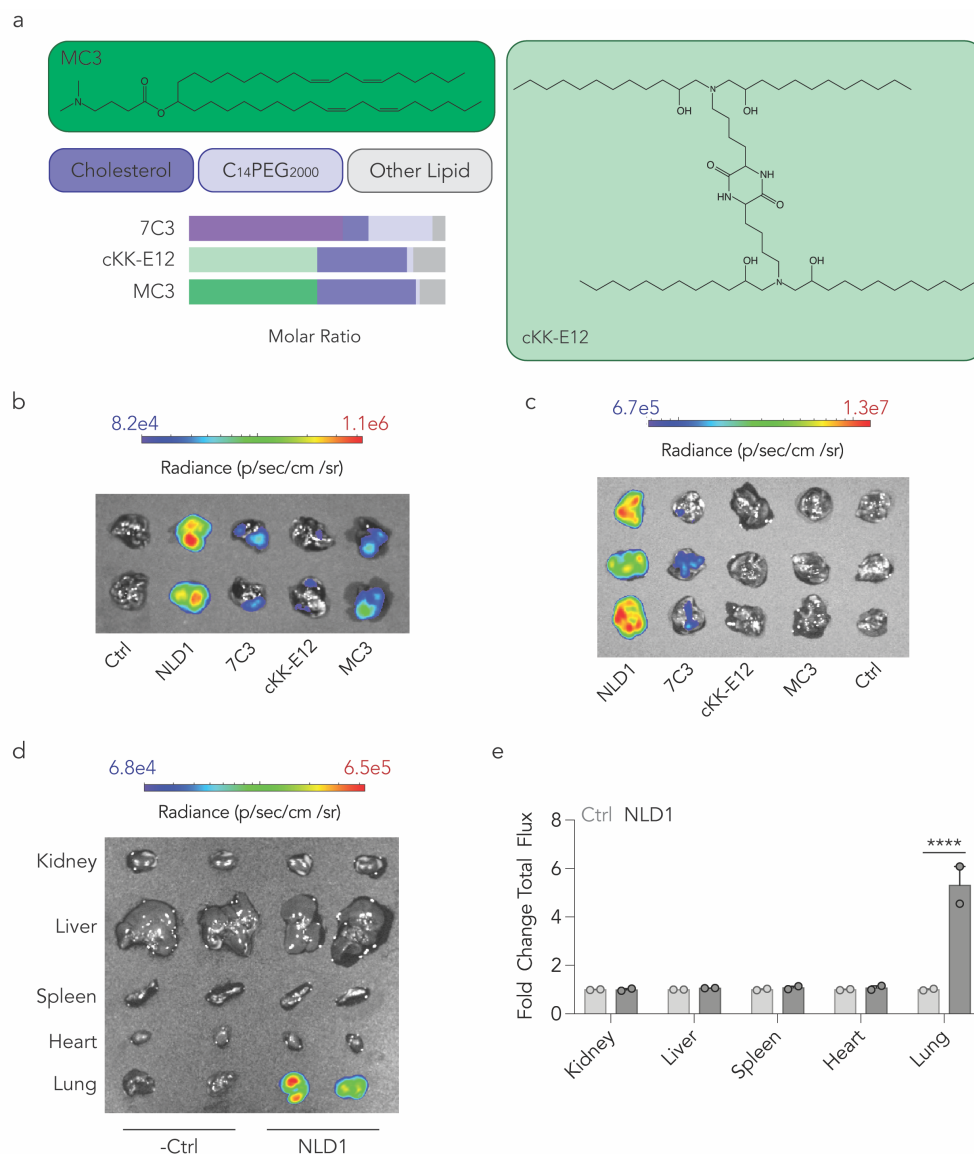

**Supplementary Figure 4. (a)** 7C3, cKK-E12, and MC3 were formulated by combining the ionizable material 7C3, cKK-E12, or MC3, C<sub>14</sub>PEG<sub>2000</sub>, cholesterol, and a neutral phospholipid. LNPs were administered via nebulization to lungs and **(b,c)** luciferase luminescence was measured. **(d,e)** 48 hours post nebulization with NLD1, luciferase luminescence was measured in kidney, liver, spleen, heart, and lungs; we only found measurable luminescence in the lungs. \*\*\*\* $P < 0.0001$ , One-way ANOVA, average  $\pm$  SEM,  $n=2$  mice/group, biological replicates shown.

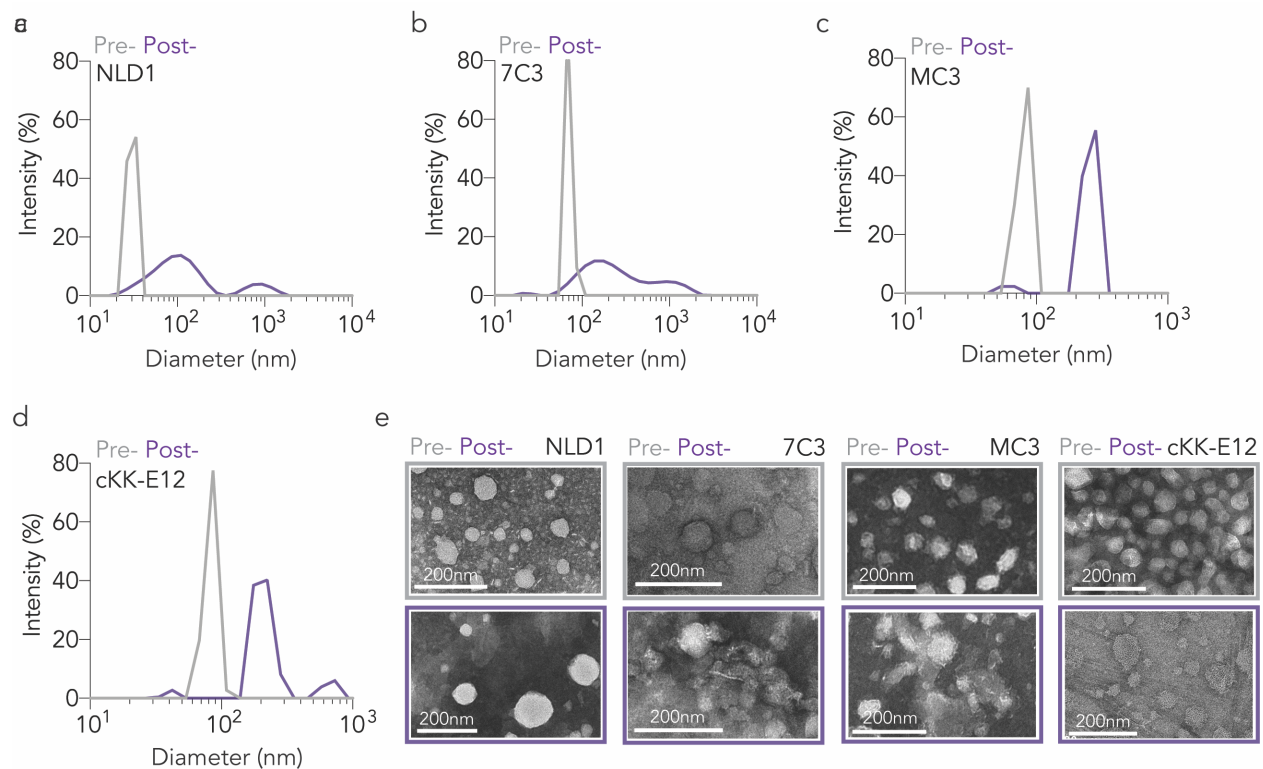

**Supplementary Figure 5.** (a) LNP diameter pre- and post-nebulization of NLD1, (b) 7C3, (c) MC3, and (d) cKK-E12. (e) TEM image of NLD1, 7C3, MC3, and cKK-E12 pre- and post-nebulization.

a

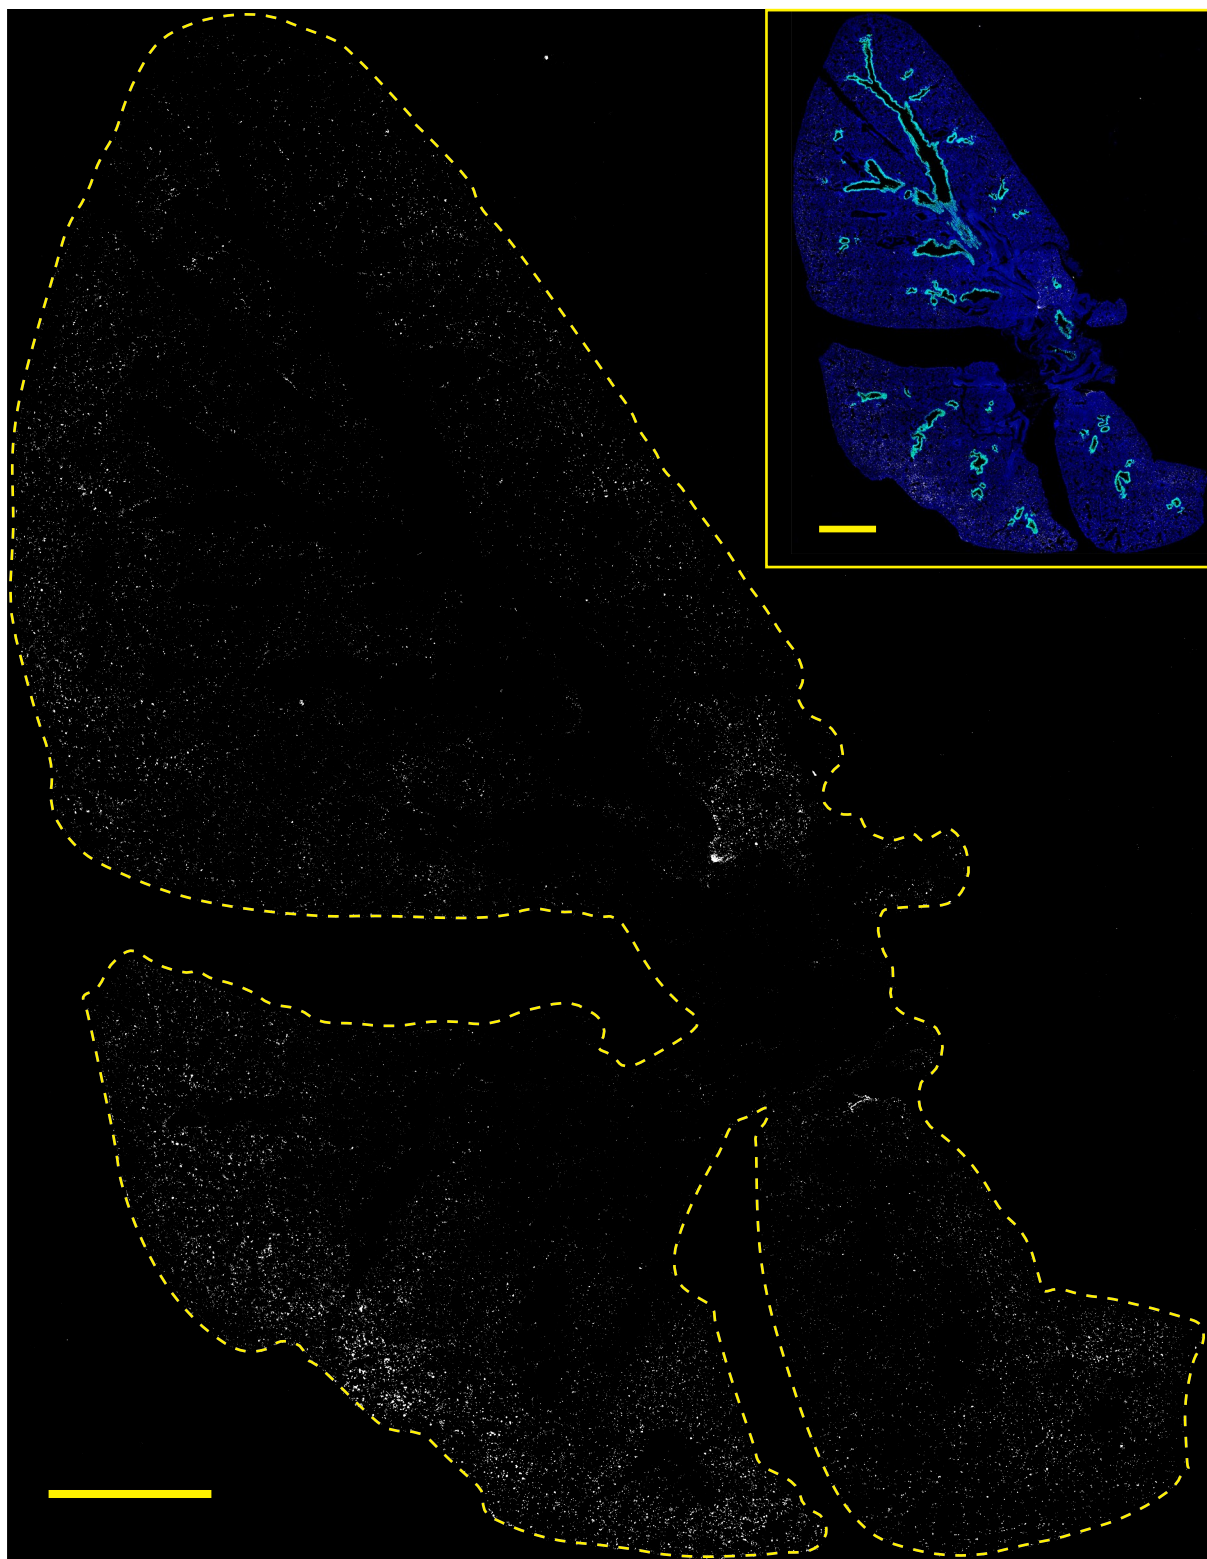

b

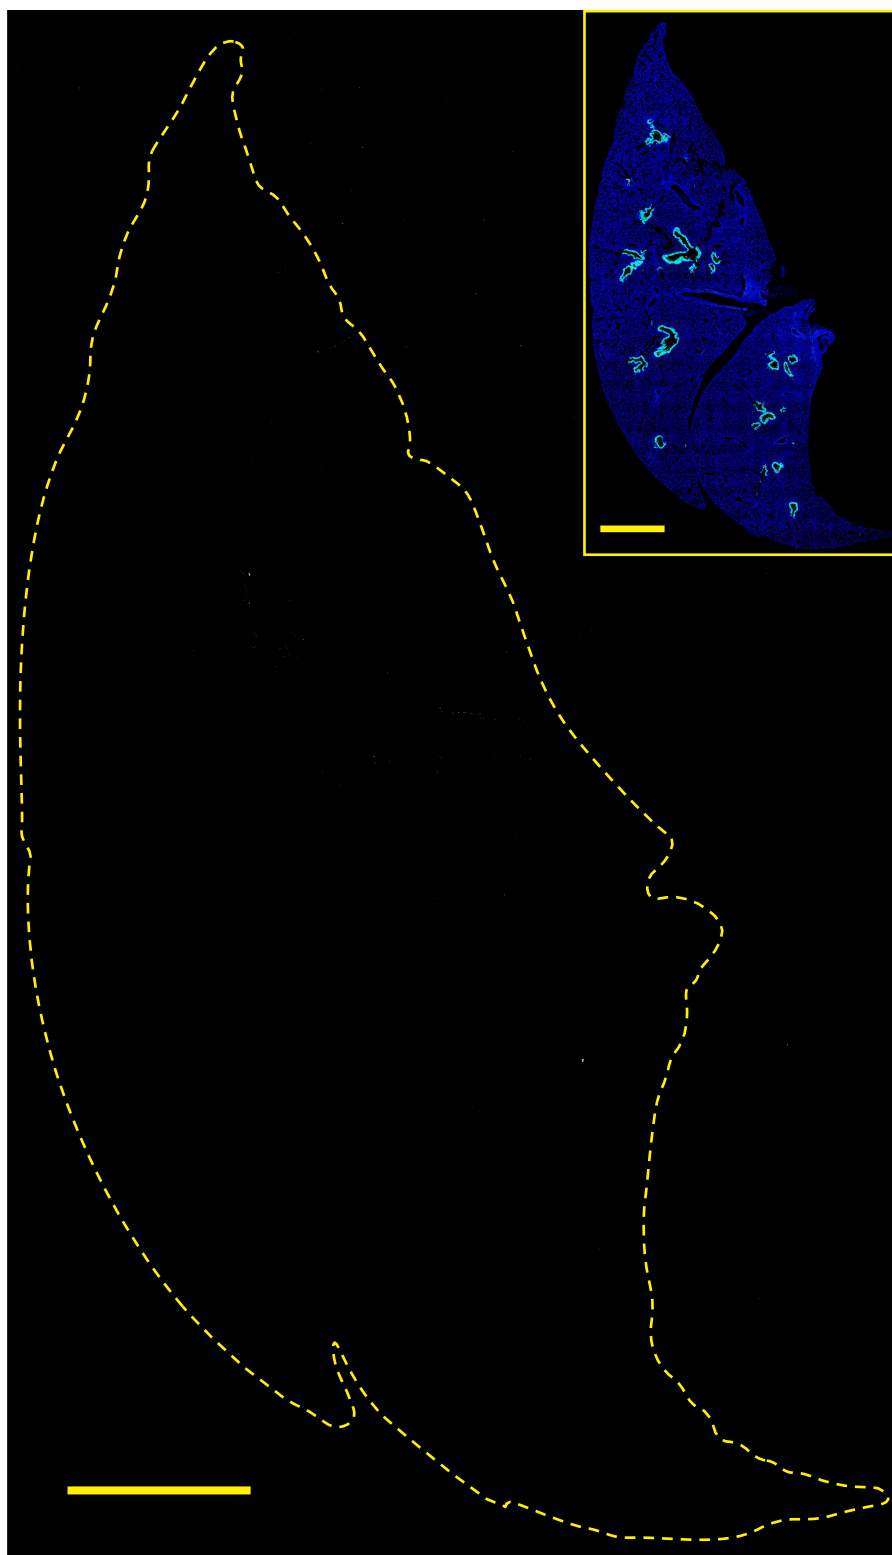

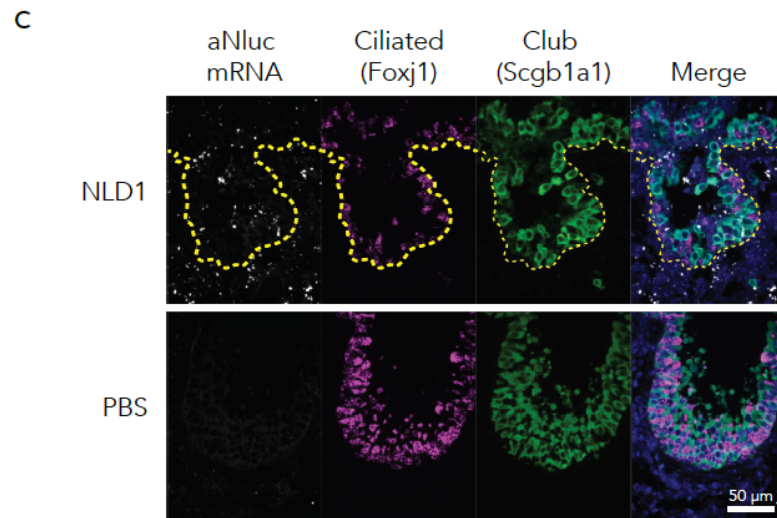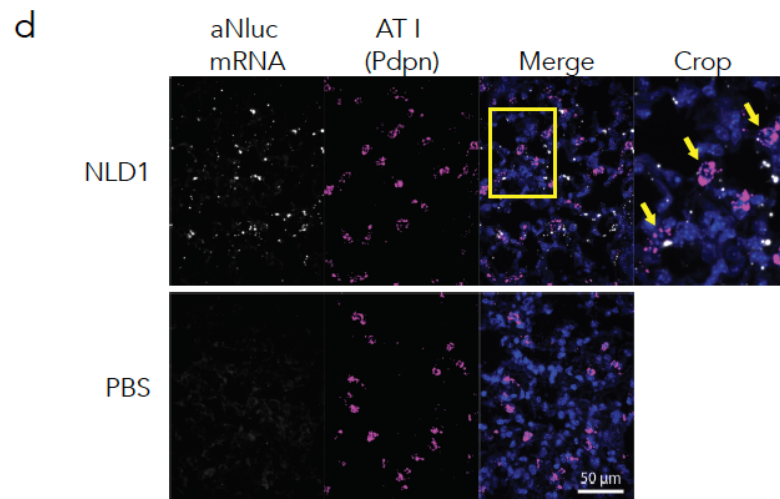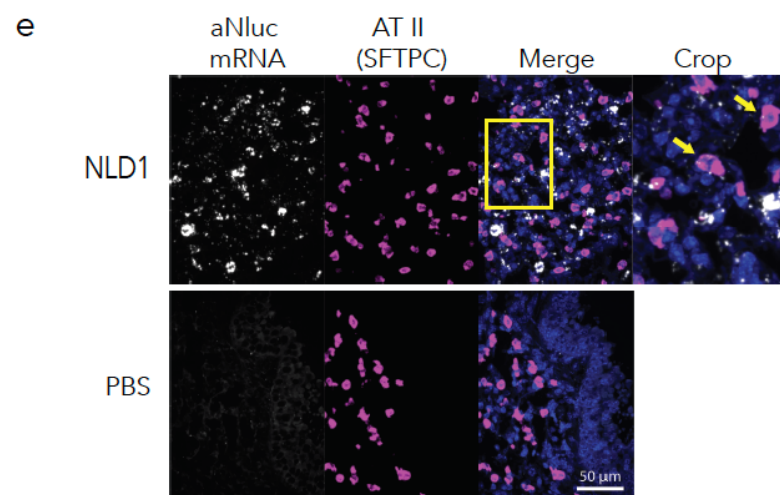

**Supplementary Figure 6. (a)** Biodistribution of AncNanoLuc mRNA throughout the lung of a mouse 4 hrs post nebulization with 100 µg mRNA. Small inset shows a lung section stained for Scgb1a1 mRNA to mark the bronchial airways (green), AncNanoLuc mRNA (white), and DAPI (blue). The expanded image shows only AncNanoLuc mRNA (white) with an outline of the lung section. The AncNanoLuc mRNA displays a punctate distribution with higher densities toward the periphery of the lung. **(b)** Negative control lung section treated with AncNanoLuc probes 4 hrs post nebulization with 1x PBS. Small inset shows a lung section stained for Scgb1a1 mRNA to mark the bronchial airways (green), AncNanoLuc mRNA (white), and DAPI (Blue). The expanded image shows only AncNanoLuc mRNA (white) with an outline of the lung section. No major background of the AncNanoLuc mRNA probes was observed in the PBS section. **(c)** FISH analysis for AncNanoLuc mRNA uptake in epithelial cell subtypes. Tissues were obtained 4 hours post nebulization with either 100 µg of AncNano-Luc mRNA in NLD-1 or 1x PBS and processed for FISH analysis. Probes against AncNanoLuc mRNA (white) show strong staining in treated tissues. Probes against Foxj1 mRNA marking ciliated bronchial epithelial cells (magenta) and Scgb1a1 mRNA marking bronchial club cells (green) were used to visualize the bronchiolar space. Uptake of AncNanoLuc mRNA was observed in these bronchial epithelial cells. **(d,e)** Probes against Pdpn mRNA and Sftpc mRNA were used to mark alveolar type I and II epithelial cells, respectively (magenta). Uptake of AncNanoLuc mRNA can be seen in both of these cell types as indicated by the yellow arrows. Scale bars represent 1mm.

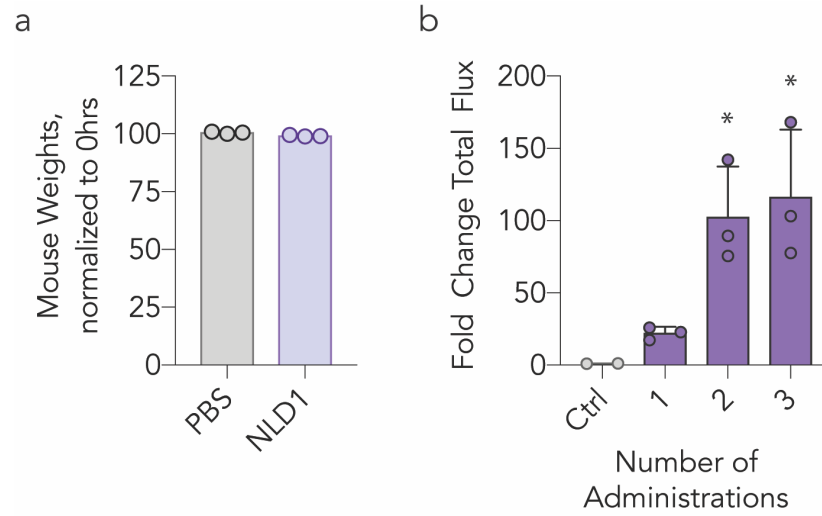

**Supplementary Figure 7. (a)** Mice showed no significant weight loss after exposure to 50  $\mu$ g of NLD1 to carry AncNanoLuc mRNA via nebulization. **(b)** NLD1 was readministered at a dose of 20  $\mu$ g / mouse. \* $P = 0.037$ , \* $P = 0.020$ , One-way ANOVA, average  $\pm$  SEM,  $n=3$  mice/group, biological replicates shown.

a

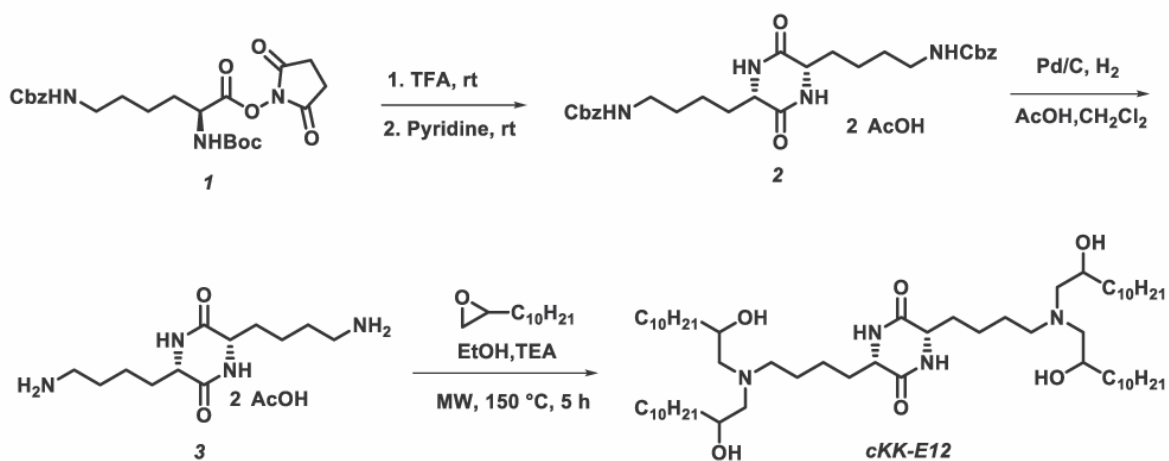

**Supplementary Figure 8. (a)** Chemical synthesis of cKK-E12.
